# Supplementary material for: Electroactive 3D printable poly(3,4-ethylenedioxythiophene)-graft-poly(ε-caprolactone) copolymers as scaffolds for muscle cell alignment
Source: Royal Society of Chemistry journal article supplement (doi:10.1039/d1py01185e), 2021-12-02
Supplement: d1py01185e1.pdf [file d1py01185e1.pdf]

## SUPPORTING INFORMATION

---

### **Electroactive 3D printable poly(3,4-ethylenedioxythiophene)-*graft*-poly( $\epsilon$ -caprolactone) copolymers as scaffolds for muscle cell alignment**

Antonio Dominguez-Alfaro,<sup>a,b</sup> Miryam Criado-Gonzalez,<sup>a</sup> Elena Gabirondo,<sup>a</sup> Haizpea Lasa-Fernández,<sup>b</sup> Jorge Olmedo,<sup>a</sup> Nerea Casado,<sup>a</sup> Nuria Alegret,<sup>b,c</sup> Alejandro Muller,<sup>a,e</sup> Haritz Sardon,<sup>a</sup> Ainara Vallejo-Illarramendi,<sup>c,d</sup> and David Mecerreyes\*<sup>a,e</sup>

<sup>a</sup> POLYMAT University of the Basque Country UPV/EHU, Avenida de Tolosa 72, 20018 Donostia-San Sebastián, Spain

<sup>b</sup> Carbon Bionanotechnology Group, Center for Cooperative Research in Biomaterials (CIC biomaGUNE), Basque Research and Technology Alliance (BRTA), San Sebastian 20014, Spain

<sup>c</sup> IIS Biodonostia, Neurosciences Area, Group of Neuromuscular Diseases. Paseo Dr. Begiristain s/n, 20014 San Sebastian, Spain

<sup>d</sup> Group of Neuroscience, Department of Pediatrics, Faculty of Medicine and Nursing, UPV/EHU, Paseo Dr. Begiristain 105, 20014 San Sebastian, Spain

<sup>e</sup> Ikerbasque, Basque Foundation for Science, 48013 Bilbao, Spain.

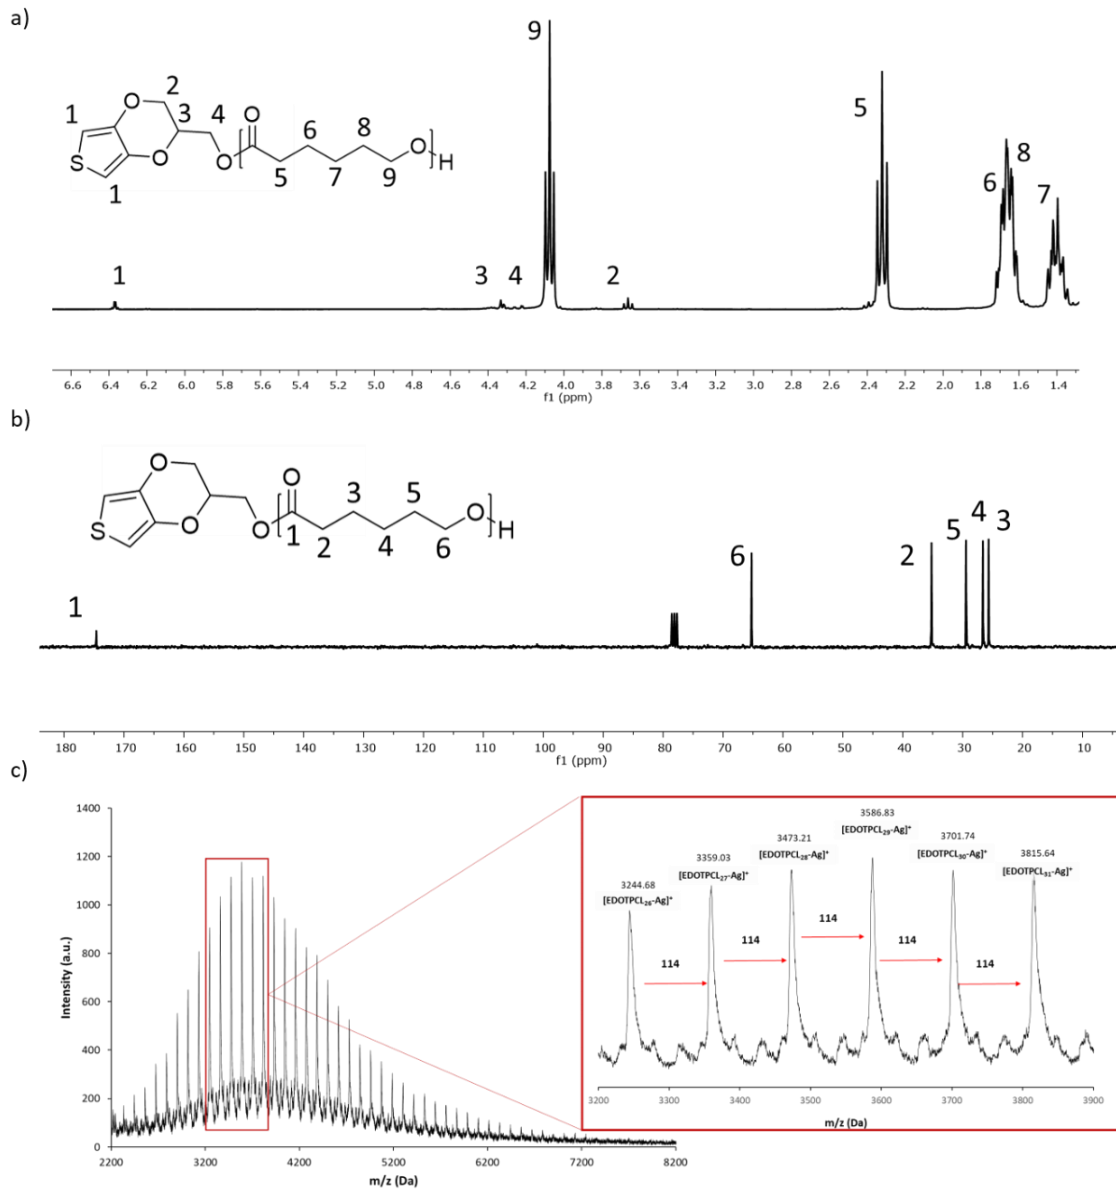

**Figure S1.** a)  $^1\text{H}$ -NMR and b)  $^{13}\text{C}$ -NMR spectra of EDOT-PCL $_{4k}$  macromonomers obtained by bulk ring-opening polymerization of  $\epsilon$ -caprolactone using hydroxyl methyl EDOT as initiator and a mixture of MSA:DMAP as organocatalysts. c) MALDI-TOF of the PCL $_{4k}$  indicating a monomodal mass profile distribution.

**Table S1.** Molecular weight, determined by SEC and  $^1\text{H-NMR}$ , and polydispersity of the EDOT-PCL macromonomers synthesized. Synthetic conditions carried out in bulk at  $130^\circ\text{C}$  for 5 days and using MSA:DMAP as organocatalyst.

| Macromonomer       | $M_n$ ( $\text{g mol}^{-1}$ ) <sup>a</sup> | $M_n$ ( $\text{g mol}^{-1}$ ) <sup>b</sup> | $M_n$ ( $\text{g mol}^{-1}$ ) <sup>c</sup> | PDI <sup>d</sup> |
|--------------------|--------------------------------------------|--------------------------------------------|--------------------------------------------|------------------|
| PCL <sub>16k</sub> | 16 000                                     | 15 400                                     | 15 221                                     | 1.56             |
| PCL <sub>8k</sub>  | 7 500                                      | 8 200                                      | 8 941                                      | 1.93             |
| PCL <sub>4k</sub>  | 4 000                                      | 3 600                                      | 4 414                                      | 1.46             |

<sup>a</sup> Theoretical number-average molecular weight

<sup>b</sup> Experimental number-average molecular weight calculated with  $^1\text{H-NMR}$

<sup>c</sup> Experimental number-average molecular weight calculated with SEC using PS standards

<sup>d</sup> Dispersity =  $M_w/M_n$  calculated by SEC

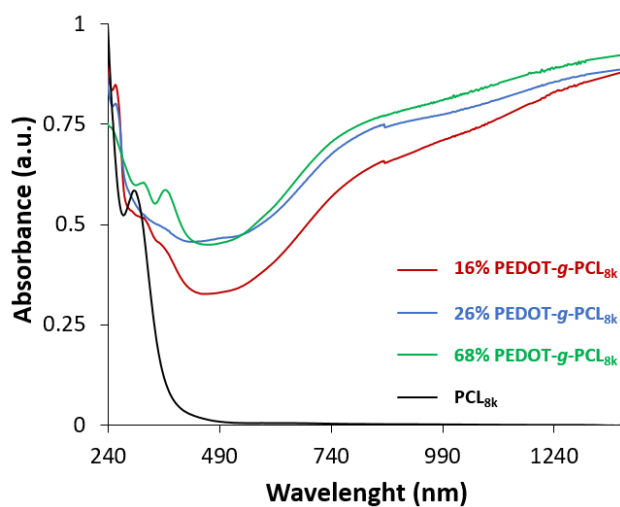

**Figure S2.** UV-vis spectra of PCL macromonomer and the copolymers PEDOT- $g$ -PCL<sub>8k</sub> synthesized with different PEDOT compositions 16, 26 and 68 %wt.

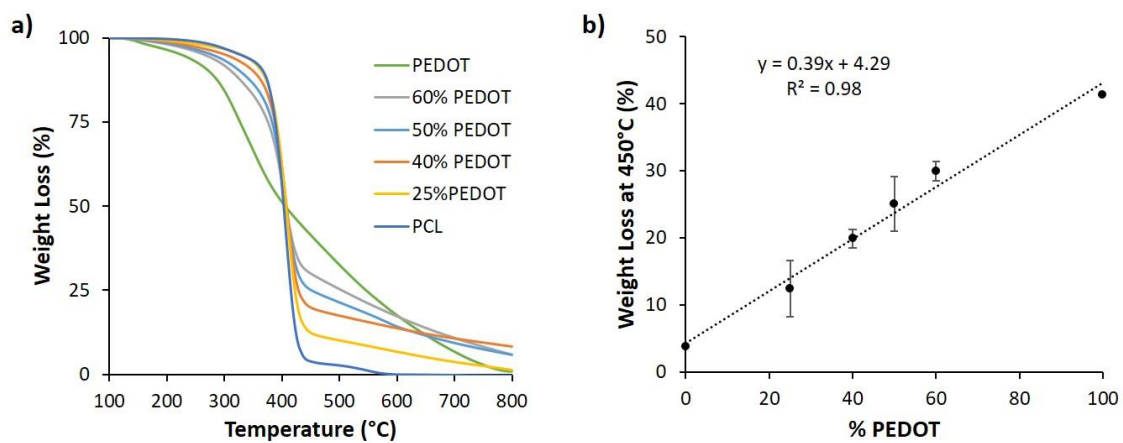

**Figure S3.** a) TGA spectra of both polymers, PEDOT and PCL, and blends with different PEDOT percentages 25, 40, 50 and 60%, to obtain b) the calibration curve employed to determine the PEDOT percentage in the synthesized PEDOT-*g*-PCL copolymers. The dashed line shows the linear fitting expressed as:  $weight\ loss\ (\%) = 0.39 + 4.29 \cdot PEDOT(\%)$

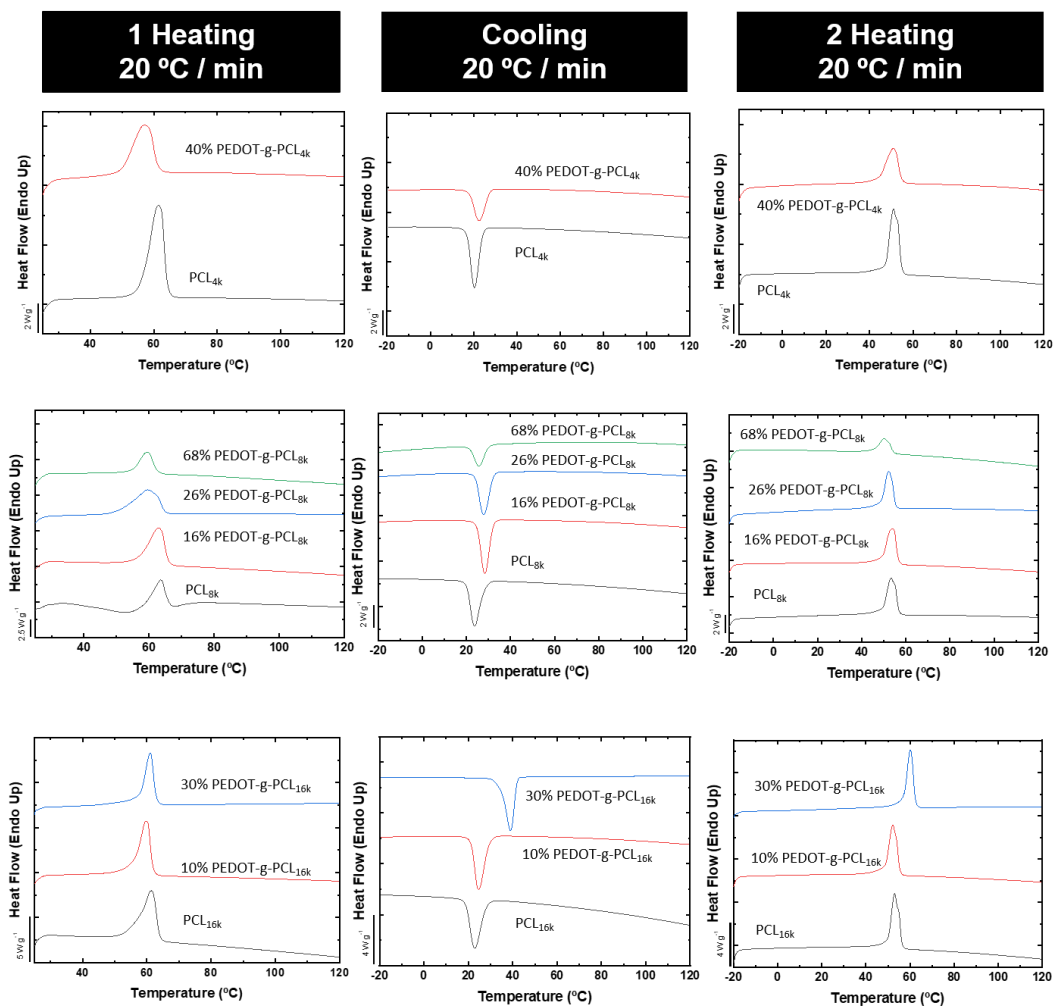

**Figure S4.** DSC of the PCL macromonomers synthesized with different number average molecular weights ( $M_n = 4k, 8k$  and  $16k$ ) and their corresponding graft copolymers a) PEDOT-g-PCL<sub>4k</sub>, b) PEDOT-g-PCL<sub>8k</sub> and c) PEDOT-g-PCL<sub>16k</sub>.

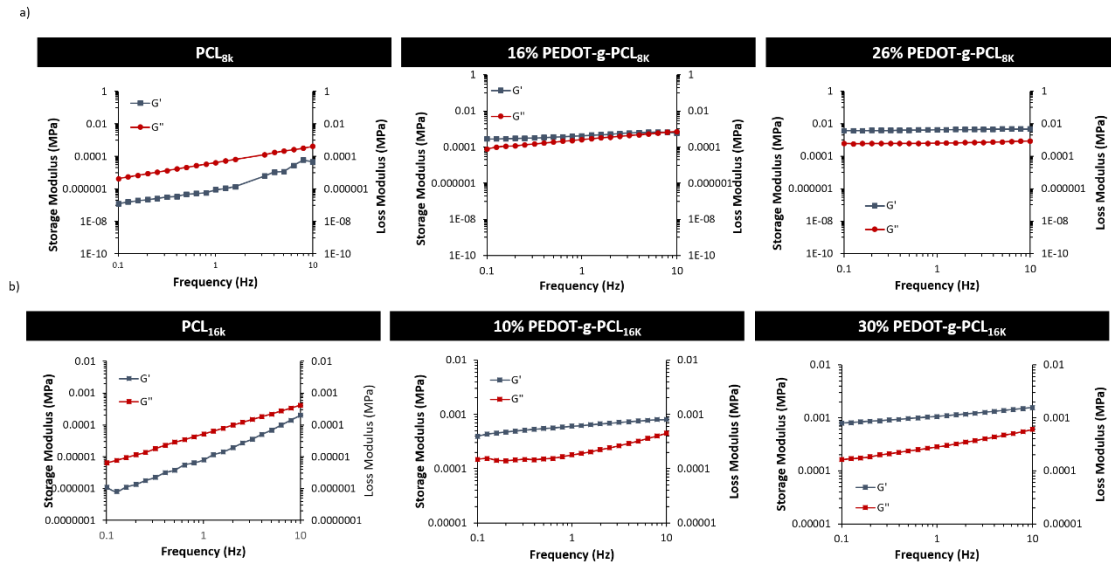

**Figure S5.** Storage modulus ( $G'$ ) and loss modulus ( $G''$ ) at 65 °C of PCL macromonomers synthesized with different number average molecular weights ( $M_n = 8k$  and  $16k$ ) and their corresponding graft copolymers a) PEDOT- $g$ -PCL $_{8k}$ , and b) PEDOT- $g$ -PCL $_{16k}$ .

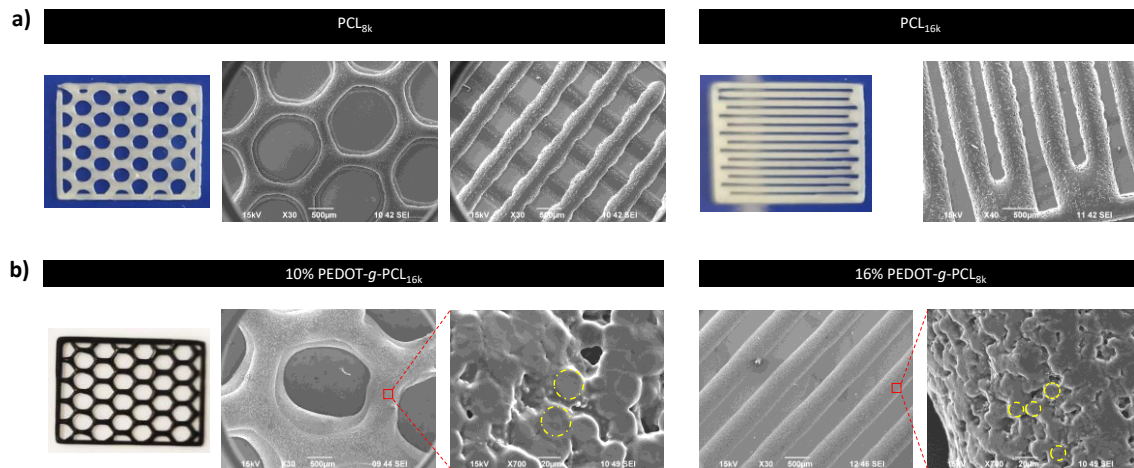

**Figure S6.** Photographs and SEM images of different printed patterns to show the high-resolution and shapes. a) PCL macromonomers ( $M_n = 8k$  and  $16k$ ), and their corresponding graft copolymers PEDOT- $g$ -PCL $_{8k}$  and PEDOT- $g$ -PCL $_{16k}$ . Note that yellow circles highlight the size of the crystals.

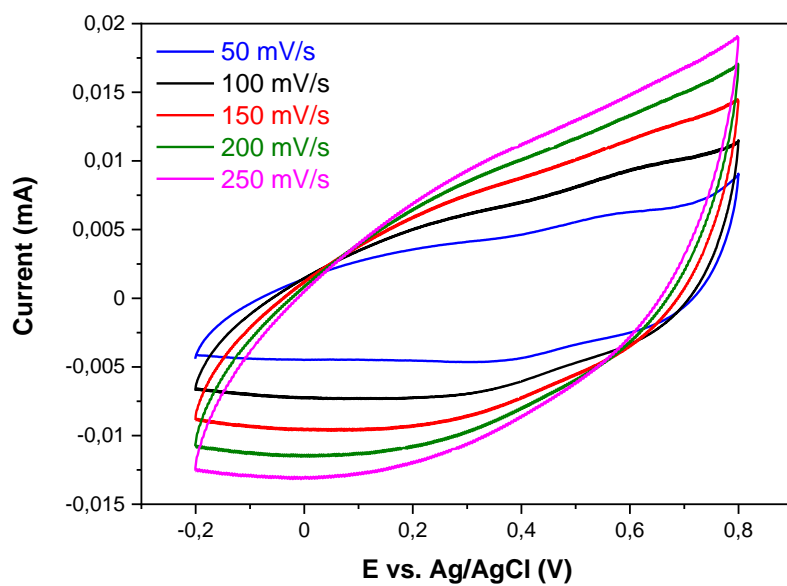

**Figure S7.** Cyclic voltammograms of 16% PEDOT-*g*-PCL<sub>8k</sub> at different scan rates, as shown in the legend of the figure.

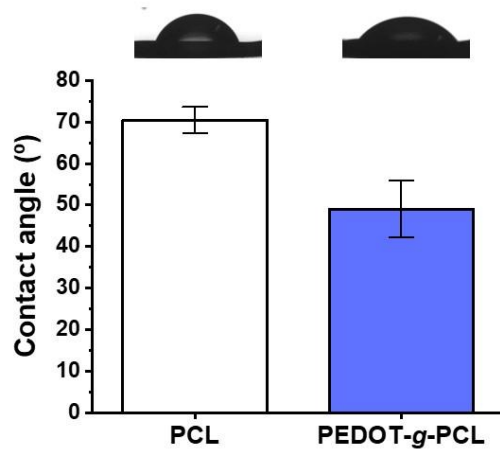

**Figure S8.** Water contact angle (WCA) of the printed patterns made of PCL<sub>16k</sub> macromonomer and the graft copolymer 16% PEDOT-*g*-PCL<sub>8k</sub>. Results show the mean  $\pm$  standard deviation of three samples.
